Muzemil et al. Submitted to European Journal of Plant Pathology

1 **Evaluation of 20 enset (*Ensete ventricosum*) landraces for response to *Xanthomonas vasicola***

2 ***pv. musacearum* infection**

3 Sadik Muzemil, Alemayehu Chala, Bezuayehu Tesfaye, David J. Studholme, Murray Grant,

4 Zerihun Yemataw, Temesgen Magule Olango

5 **Corresponding author:** Sadik Muzemil (mik.mub2@gmail.com)

6

7 **Abstract**

8 Bacterial wilt, caused by *Xanthomonas vasicola* pv. *musacearum* (Xvm), formerly *X. campestris*  
9 pv. *musacearum*, is the most threatening and economically important disease of enset (*Ensete*  
10 *ventricosum*), the multipurpose food security crop orphan to south and southwestern Ethiopia.  
11 Xvm has also had a major impact on banana and plantain production in East Africa following its  
12 detection in Uganda in 2001 and subsequent spread. Effective control of this disease currently  
13 relies on integrated disease management (IDM) strategies including minimization of field  
14 pathogen inoculum and deployment of wilt resistant enset landraces. Identifying landraces with  
15 stable and durable Xvm resistance will greatly accelerate breeding of varieties that can be included  
16 as a component of IDM. In this study, 20 enset landraces previously reported to exhibit lower  
17 susceptibility to Xvm were grown in pots under open field conditions and inoculated with an  
18 aggressive Xvm inoculum isolated from a disease hotspot area. Longitudinal and survival analyses  
19 were applied to each landrace, based on disease units representing a combination of area-under-  
20 disease progress stairs, disease index and apparent infection rate. Considerable variation was  
21 observed among the 20 landraces; however, none exhibited full immunity to Xvm infection. Three  
22 landraces, viz. Hae'la, Mazia and Lemat (HML), showed lowest susceptibility to Xvm as  
23 evidenced by lower disease units and higher survival rates. Landraces Kuro, Gezewet, Bededet,  
24 and Alagena showed similar levels of Xvm infection as did HML, but with lower survival rates.  
25 By contrast, landrace Arkia showed the highest infection level and lowest survival rate, suggesting  
26 a high degree of susceptibility to Xvm. This study identifies new material that can be used in future  
27 breeding programmes to develop Xvm-resistant enset varieties.

28 **Keywords:** Enset landrace, bacterial wilt disease, resistance, susceptibility

29 **Author Addresses**

30 • Sadik Muzemil: Southern Agricultural Research Institute, Areka Agricultural Research

31 Center, Areka, Ethiopia,

32 • Alemayehu Chala: Hawassa University, College of Agriculture, Hawassa Ethiopia

33 • Bezuayehu Tesfaye: Hawassa University, College of Agriculture, Hawassa Ethiopia

34 • David J. Studholme: Biosciences, University of Exeter, Exeter, United Kingdom

35 • Murray Grant: School of Life Sciences, Gibbet Hill, University of Warwick, Coventry,

36 CV4 7AL, UK

37 Zerihun Yemataw: Southern Agricultural Research Institute, Hawassa Agricultural

38 Research Center, Hawassa, Ethiopia,

39 • Temesgen Magule Olango: Hawassa University, College of Agriculture, Hawassa Ethiopia

40

41 **1. Introduction**

42 Enset (*Ensete ventricosum* (Welw.) Cheesman) is a diploid ( $2n=18$ ), herbaceous, perennial  
43 monocarpic crop belonging to the family *Musaceae*. Enset is often referred to as false banana, due  
44 to its phenotypic resemblance to banana (*Musa* species). The crop is cultivated exclusively in  
45 Ethiopia, where it has a considerable economic and social importance for millions (Brandt *et al.*,  
46 1997; Borrel et al., 2019).

47 Enset is tolerant to prolonged drought and provides a year-round source of staple nutritious food.  
48 It is thus widely cultivated across south and southwestern Ethiopia contributing to improved food  
49 security for more than 20 million Ethiopians (Yesuf and Hunduma, 2012, Yemataw et al., 2017).  
50 For farmers, enset is more than a year-round staple food, as it provides multiple additional daily  
51 benefits yet requires little crop management husbandry. The multipurpose benefits are derived  
52 from different enset landraces that are particularly suited for feed, fiber, packaging, construction  
53 material as well as providing a medicinal role (Brandt et al., 1997; Nurfeta et al., 2008; Yemataw  
54 et al., 2017). Due to its long history of cultivation across diverse ethnic groups, enset has  
55 significant cultural and socio-economic value in Ethiopia (Shigeta, 1990; Olango et al., 2014,  
56 Borrell et al., 2019).

57 Enset production is threatened by bacterial wilt disease caused by *Xanthomonas vasicola* pv.  
58 *musacearum* (Xvm) (Ashagari, 1981, 1985; Archido and Tessera, 1993; Tessera et al., 2008; Yesuf  
59 and Hunduma, 2012; Nakato et al., 2018). The bacterial disease was first reported in Kaffa district  
60 of Ethiopia in 1960's initially on enset (Yirgou and Bradbury, 1968) and subsequently on banana  
61 (Yirgou and Bradbury, 1974). However, the first observations for the bacterial disease on enset in  
62 Ethiopia dates back to 1930s (Castellani, 1939). The causative agent was previously known as

Muzemil et al. Submitted to European Journal of Plant Pathology

63 *Xanthomonas musacearum* and *X. campestris* pv. *musacearum*, but a recent taxonomic study been  
64 transferred it to the species *Xanthomonas vasicola* (Studholme et al. 2019 in press). Currently, the  
65 disease is found distributed in all enset growing areas of southern and southwestern Ethiopia,  
66 where it has a devastating impact on enset production (SARI-McKnight CCRP, 2013; Blomme et  
67 al., 2017; and Nakato et al., 2018). Other diseases caused by fungi (Tessera and Quimio, 1993),  
68 viruses (Tessera et al., 2003) and nematodes (Bogale et al., 2004) also affect enset. Mammals and  
69 pests such as porcupines, mole rats, wild pigs and insects such as mealybugs (Azerefegne et al.,  
70 2009) also impact enset production (Handoro et al., 2012).

71 Enset landraces in Ethiopia might offer enhanced resistance to Xvm, thus potentially offering a  
72 huge genetic resource to farmers though no systematic patho-testing for responses to Xvm has yet  
73 been implemented. Currently, farmers claim that certain enset landraces show relatively low level  
74 of infection to Xvm and they often incorporate these landraces in their backyard landrace mixture  
75 as one option for disease management (Ashagari, 1985; SARI-McKnight CCRP, 2013; Yemataw  
76 et al., 2016). Nevertheless, identification of resistant landraces has been challenging. Literature  
77 has reported enset landraces with lower but varying susceptibility to Xvm infection (Ashagari,  
78 1985; Archaido and Tessera, 1993; Handoro and Welde-Michael, 2007; Welde-Michael et al.,  
79 2008; Haile et al., 2014; Hunduma, 2015; Wolde *et al.*, 2016; Handoro and Said, 2016). However,  
80 inconsistency in enset landraces' responses to Xvm has been observed (Ashagari, 1985; Handoro  
81 and Welde-Michael, 2007; Welde-Michael *et al.*, 2008; Tadesse *et al.*, 2008), with variation in  
82 virulence among batches of Xvm inoculum being the most probable cause. Notably, existing Xvm  
83 resistance phenotyping data primarily comprise assessments of individual landraces.

84 In banana transgenic approaches have been demonstrated for resistance against Xvm (Namukwaya  
85 et al., 2012) due to absence of genetic resistance in the cultivated banana germplasm pool. While

Muzemil et al. Submitted to European Journal of Plant Pathology

86 initial results look promising, this approach would require biosafety regulations for the adoption  
87 and use of transgenic plants, and adoption of the approach to ensset. Hence, the availability of  
88 sources of resistance to Xvm in ensset germplasm could serve as a breeding stock against Xvm in  
89 ensset as well as banana plant.

90 To date, no systematic screening has been undertaken on the same ensset landraces that are reported  
91 to have high tolerance to Xvm infection. Such a study would greatly assist breeding/selection  
92 efforts to identify elite landraces exhibiting enhanced Xvm resistance. In this paper we have  
93 undertaken field experiments to re-evaluate selected ensset landraces previously reported to have  
94 reduced susceptibility to Xvm. We undertook a detailed study of the infection reaction and  
95 identified specific ensset landraces with potential to contribute towards sustainable management of  
96 the disease, using a common garden experiment at a single site to minimize environmental  
97 variability and enable a detailed study of the infection reaction and identify specific ensset landraces  
98 with potential to contribute towards sustainable management of the disease.

99

100 **2. Materials and Methods**

101 2.1. Description of the study site

102 Evaluation of enset landraces for resistance to *Xanthomonas vasicola* pv. *musacearum* (Xvm) was  
103 carried out using an open-field potted experiment at Southern Agricultural Research Institute  
104 (SARI), Hawassa, Ethiopia. The site is located at 7°4' N and 38°31' E with an elevation of 1700  
105 meters above sea level and having an annual rain fall of 1100 mm. The annual average, minimum,  
106 and maximum temperatures at Hawassa are 20.6°C, 13.5°C and 27.6°C, respectively.

107 2.2. Plant material acquisition and multiplication

108 This study used 18 enset landraces previously reported to exhibit low level infection or having  
109 contrasting infection phenotypes following Xvm inoculation. Landrace 'Arkia', was also included  
110 for comparison because it was previously reported to support a high level of Xvm growth. Also  
111 included was landrace 'Bota Arkia', which has a similar name to landrace 'Arkia' but of different  
112 origin. This gave a total 20 landraces for the present study (Table 1).

113 To initiate the experiment, underground corms of 2-3 year old mother plants from each of the 20  
114 landraces were macro-propagated to produce true-to-type suckers for the experiment. Mother  
115 corms of landrace Mazia were kindly provided by Areka Agricultural Research Center (AARC).  
116 The remaining 19 enset landraces were collected from enset farmers in six enset growing zones of  
117 southern Ethiopia viz. Dawro, Gedio, Gurage, Kambata, Sidama and Wolaita. Collection of the  
118 landraces from these areas was undertaken by first confirming that the landrace described was true  
119 for its reaction to Xvm, followed by a rapid appraisal on site to avoid the possibility of mis-  
120 identification (Figure 1).

121 Table 1. Enset landraces studied for their reaction to *Xanthomonas vasicola* pv. *musacearum*  
 122 (Xvm)and previously recorded reaction to Xvm.

| No | Enset landraces | Collection zones*                      | Previously reported response**  | References for landrace reaction to Xvm                                                                                              |
|----|-----------------|----------------------------------------|---------------------------------|--------------------------------------------------------------------------------------------------------------------------------------|
| 1  | Abatemerza      | Kambata                                | Resistance /Tolerant            | Handoro and Said (2016)                                                                                                              |
| 2  | Ado             | Sidama                                 | Moderately Tolerant             | Ashagari (1985), Welde-Michael et al. (2008)                                                                                         |
| 3  | Alagena         | Wolaita                                | Resistance /Tolerant            | Handoro and Said (2016)                                                                                                              |
| 4  | Arkia           | Wolaita                                | Susceptible                     | Handoro and Said (2016)                                                                                                              |
| 5  | Bededet         | Gurage                                 | Moderately Tolerant             | Wolde et al. (2016)                                                                                                                  |
| 6  | Bota Arkia      | Dawro                                  | NA                              |                                                                                                                                      |
| 7  | Dirbo           | Kambata                                | Resistance /Tolerant            | Handoro and Said (2016)                                                                                                              |
| 8  | Gefetano        | Wolaita                                | Resistance /Tolerant            | Handoro and Said (2016)                                                                                                              |
| 9  | Genticha        | Sidama                                 | Moderately Tolerant             | Ashagari (1985), Welde-Michael et al. (2008)                                                                                         |
| 10 | Gezewet         | Gurage                                 | Susceptible                     | Welde-Michael et al. (2008)                                                                                                          |
|    |                 | Gurage                                 | Resistant                       | Wolde et al. (2016)                                                                                                                  |
| 11 | Ginbuwa         | Gurage                                 | Tolerant                        | Handoro and Said (2016)                                                                                                              |
| 12 | Godere          | Wolaita                                | Resistance /Tolerant            | Handoro and Said (2016)                                                                                                              |
| 13 | Hae'la          | Kambata                                | Highly Tolerant                 | Tessera et al. (2000), Gizachew et al. (2008)                                                                                        |
| 14 | Kuro            | Dawro                                  | Moderately Tolerant             | Handoro and Said (2016)                                                                                                              |
| 15 | Lemat           | Gurage                                 | Moderately Resistance /Tolerant | Welde-Michael et al. (2008), Handoro and Said (2016)                                                                                 |
|    | Lemat           | Gurage                                 | Susceptible                     | Mekuria et al. (2016)                                                                                                                |
| 16 | Mazia           | AARC (Originally Collected from Dawro) | Resistance /Tolerant            | Handoro and Welde-Michael, (2007), Welde-Michael et al. (2008), Tessera et al. (2008), Tariku et al. (2015), Handoro and Said (2016) |
| 17 | Nechuwe         | Gurage                                 | Moderatel Tolerant              | Welde-Michael et al. (2008),                                                                                                         |
|    |                 | Gurage                                 | Susceptible                     | Wolde et al. (2016)                                                                                                                  |
| 18 | Unjeme          | Kambata                                | Resistance /Tolerant            | Handoro and Said (2016)                                                                                                              |
| 19 | Wachiso         | Kambata                                | Resistance /Tolerant            | Handoro and Said (2016)                                                                                                              |
| 20 | Yesha           | Dawro                                  | Resistance /Tolerant            | Handoro and Said (2016)                                                                                                              |

123 \* Administrative zone in Southern Ethiopia where the respective enset landrace was collected from farmers  
 124 field. Original collection history of the landraces obtained from the articles listed.

125 \*\* The recorded Xvm response indicated was derived from the accompanying cited article(s).

126



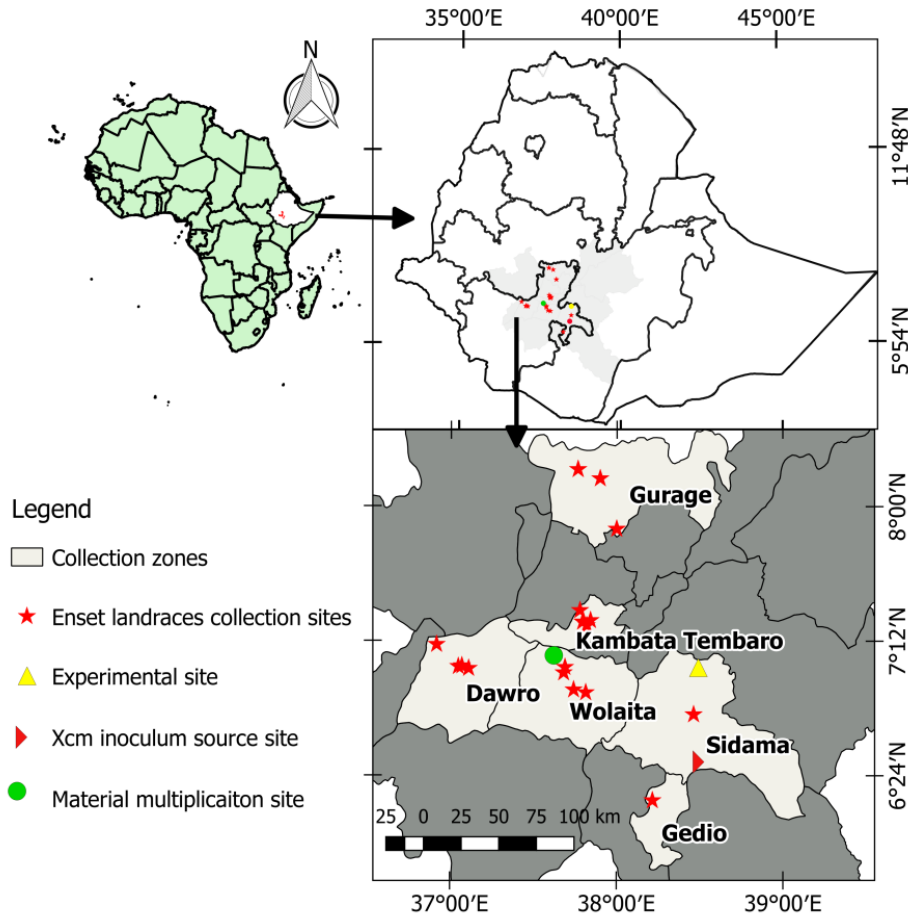

Figure 1. Geographical locations of enset landraces collection and experimental sites.

Following collection, enset landraces were multiplied at Areka Agricultural Research Center (AARC) using an enset macro-propagation method previously described (Yeshitila et al. 2009).

Briefly, the mother corm was dissected into two equal halves and the apical tissue removed from the center of each half corm to allow secondary meristems to develop into suckers for planting.

These dissected corms are dried in the shade for 3 hours prior to planting. Each half corm was planted in slanted orientation in holes of 1 m x 1m and covered with soil.

After 12 months, multiplied enset suckers were uprooted and transplanted into a 5 kg capacity plastic pot filled with sun dried mixtures of soil: sand: manure at a ratio of 3:1:1 (Quimio, 1992)

137 and placed in an open field experimental site at SARI. Suckers were allowed to establish for two  
138 months to get sufficient leaves (>3) to allow inoculation with Xvm. During this establishment  
139 period, suckers in plastic pots were watered daily prior to inoculation with Xvm and for a  
140 subsequent two months after Xvm inoculation. Watering thereafter was reduced to two times per  
141 weeks for remaining experimental period.

### 142 2.3. Preparation of bacterial suspension for inoculation

143 Virulent Xvm was collected from a disease hot spot in the Hagereselam area, Sidama Zone,  
144 southern Ethiopia. Xvm bacterial ooze from young leaves and /or pseudostem of diseased enset  
145 plants was harvested into sterile distilled water and preserved at 4<sup>0</sup>C until use. Two sets of bacterial  
146 suspensions were prepared for hypersensitivity and pathogenicity tests. One comprised the  
147 uncultured bacterial suspension. The other was derived from a day-old preserved field harvested  
148 Xvm isolates streaked on YPSA (5 g yeast extract, 10 g peptone, 20 g sucrose and 15 g agar) – a  
149 growth and isolation medium used for selecting pure Xvm colonies (Haile *et al.*, 2014). These  
150 plates were incubated at 28°C for 24 h (Schaad and Stall, 1998). Single colonies with a yellow,  
151 convex, mucoid morphology typical of Xvm were harvested and preserved in YPSA slants at 4<sup>0</sup>C.

### 152 2.4. Hypersensitivity and pathogenicity tests

153 Both uncultured and cultured suspension were tested for hypersensitivity and pathogenicity on  
154 two-month-old tobacco (*Nicotiana tabacum*) or the highly susceptible control enset landrace  
155 ‘Arkia’. In hypersensitivity test conducted on *N. tabacum* (Bobosha, 2003) using both inoculum  
156 types independently, 2 ml of a bacterial suspension containing  $\sim 1.0 \times 10^8$  colony forming units  
157 (cfu) per mL (approximately OD<sub>600</sub> = 0.5) was used for inoculation. A positive hypersensitive

158 response was scored if tissue exhibited yellow clearing chlorosis limited to around the point  
159 injection.

160 For initial assessment of pathogenicity tests, 14-month-old (i.e. two months after transplanting)  
161 disease-free enset suckers of the susceptible landrace 'Arkia' (Handoro and Welde-Michael, 2007)  
162 were infected with 4 mL of bacterial suspension ( $\sim 10^8$  cfu/mL at  $OD_{600} = 0.5$ ) from uncultured and  
163 cultured inocula.

#### 164 2.5. Inoculation of Xvm to test landraces

165 As the uncultured bacterial suspension resulted in shorter incubation period and more severe  
166 disease on both *N. tabacum* and enset landrace Arkia during the pathogenicity tests, field-  
167 harvested, uncultured Xvm suspensions preserved at 4 °C were used as inoculum for landrace  
168 evaluation. Suckers of 14-months-old enset landraces (two months after transplanting in potted  
169 soil mix) were inoculated with a 4 mL aliquot of the bacterial suspension, adjusted to  $\sim 10^8$  cfu/mL  
170 as described above, by infiltration with a hypodermic sterile syringe into the youngest innermost  
171 leaf petiole (Figure 2). A new sterile hypodermic syringe was used for inoculating each sucker of  
172 every landrace. Control plants were infiltrated with the same volume of sterile distilled water. The  
173 pot experiment was organized in four replicates of 20 landraces, each landrace containing 10 plants  
174 and landraces within each replication were randomized. Thus, the entire experiment comprised a  
175 total of 800 plants. This included a total of 30 individuals of the 20 enset landraces inoculated with  
176 uncultured Xvm suspension and a further 10 individuals of the 20 plants comprising negative  
177 controls inoculated with sterile distilled water.

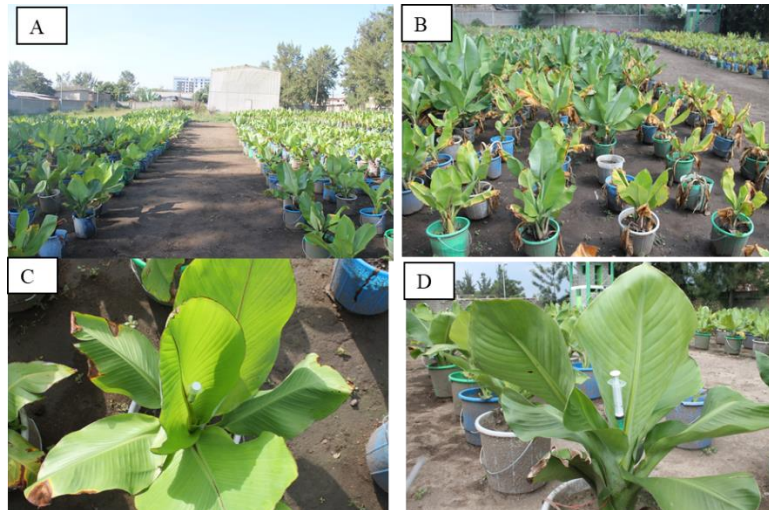

178

179 Figure 2. Evaluation of enset landraces grown under potted soil mix (A and B) and inoculation of  
180 landraces (C and D) with uncultured *Xanthomonas vasicola* pv. *musacearum* (Xvm) suspension

181 2.6. Measurements and data analysis

182 Data recording and quantifying disease progression

183 Data collection was initiated a week after inoculation and continued weekly for the first three  
184 weeks, then at two-week intervals for 155 days thereafter. It was notable that in the first two weeks  
185 following infection, some enset landraces showed unusual infection responses including twisting  
186 of the leaf blade in some landraces, rolling or curling of the leaf tip and leaf edge in other enset  
187 landraces. From the third week after Xvm infection onward, we observed typical wilting symptoms  
188 such as severe drooping of the top 25% of leaf blade, collapsing of the leaf blade, wilting of both  
189 inoculated and adjacent uninoculated leaves, chlorosis across the majority of leaves and, in certain  
190 landraces, complete death. At each evaluation time, the number of leaves per plant that showed  
191 these consistent wilting symptoms and total number of asymptomatic leaves per plant were  
192 recorded. Data from the “inconsistent” first two-week period were excluded from analysis as it was  
193 not possible to associate these initial responses with a phytopathological response.

194 Four response variables were used to quantify onset disease phenotypes following Xvm infection:  
195 disease index (DI), area under disease progress stairs (AUDPS), apparent infection rate (AIR) and  
196 survival. DI is the percentage of symptomatic leaves per individual at each evaluation period  
197 averaged across the 4 replicates (Schandry, 2017). DI helps to quantify disease symptoms over the  
198 evaluation period using a scale of 0-4, with 1 and 4 corresponding to 25% and 100% of total wilted  
199 leaves per plant respectively.

200 
$$\text{Disease Index (DI)} = \frac{w}{t} \times 4$$

201 Where,  $w$  is the number of symptomatic leaves and  $t$  is the number of total leaves of a single plant.  
202 AUDPS (Simko and Piepho, 2012) was used to estimate disease accumulation and progress over  
203 time. AUDPS is proposed to provide better estimates of the disease by giving weight closer to the  
204 optimal than that derived from AUDPC (area under disease progress curve) assessments (Madden  
205 *et al.*, 2007). AIR, corresponding to the speed at which an epidemic develops (Meena *et al.*, 2011),  
206 was calculated as the slope of disease index development. Finally, survival analysis was applied  
207 to study the fraction of survivors per time point among onset landraces challenged with Xvm.  
208 Survival data was generated according to Schandry (2017) with a customized DI cut-off point of  
209 2.23. This cut-off DI was used for comparison purpose and is the maximum DI value of landrace  
210 Mazia that is frequently cited (Table 1) for its resistance/tolerance to Xvm.

211 
$$\text{Area under disease Progress Curve (AUDPC)} = \sum_{i=1}^{n-1} \frac{y_i + y_{i+1}}{2} \times (t_{i+1} - t_i)$$

212 
$$\text{Area Under Disease Progress Stairs (AUDPS)} = \text{AUDPC} + \left[ \frac{y_1 + y_n}{2} \times \frac{D}{n-1} \right]$$

Muzemil et al. Submitted to European Journal of Plant Pathology

213 Where,  $y_i$  is disease index at the  $i^{\text{th}}$  observation,  $t_i$  is time in days at the  $i^{\text{th}}$  observation,  $n$  is the  
214 number of total observations, and  $D$  is duration from the first to the last observation ( $D=t_n-t_1$ ).,  $n$   
215 is the number of total observations, and  $D$  is duration from the first to the last observation ( $D=t_n-$   
216  $t_1$ ).

217 Data analysis and visualization

218 Various functions from the following R packages were used for data manipulation and formatting:  
219 *broom* (Robinson et al, 2015), *dplyr* (Wickham and Francois, 2015), *magrittr* (Bache and  
220 Wickham, 2014), *modelr* (Wickham, 2016a), *stargazer* (Hlavac, 2015), *stringr* (Wickham, 2010),  
221 *tidyr* (Wickham et al., 2017) and *tidyverse* (Wickham, 2016b). For most of the disease parameters  
222 in this study, data were fitted to linear mixed model using functions in *lme4* package (Bates et al.,  
223 2015) to properly account for differential disease development in enset landraces over time. The  
224 linear model (*lm*) function from the base *stats* package was employed. For model comparison in  
225 the disease units and survival analysis, Akaike information criterion (AIC) and Schwarz's  
226 Bayesian information criterion (BIC) were used to identify the best model among the alternatives.  
227 Models with the lower AIC and BIC value were used for analysis. Functions from *emmeans*  
228 (Russell, 2019) and *lmerTest* (Kuznetsova et al., 2016) were used to extract means from data fitted  
229 to linear and linear mixed models respectively, applying the process "data manipulation for result  
230 visualization". Graphic visualizations were done using *ggplot2* (Wickham, 2009).

231 Functions from the following packages were used for analysis: *MESS* (Ekstrøm, 2016), *survival*  
232 (Therneau and Lumley, 2011), *survcomp* (Schröder et al., 2011), *rms* (Harrell Jr, 2016), *coxme*  
233 (Therneau, 2015b), *lme4* (Bates et al., 2015), *lmerTest* (Kuznetsova et al., 2016), *multcomp* (Hoth

Muzemil et al. Submitted to European Journal of Plant Pathology

234 on *et al.*, 2008), and *rcompanion* (Mangiafico, 2017). Packages *rmarkdown* (Allaire et al., 2015)  
235 and *knitr* (Xie, 2014, 2015, 2016) were used to generate R Markdown (.rmd) files. Furthermore,  
236 scripts used in data manipulation, analysis and visualization are available in the Rmarkdown  
237 ([supplementary R\\_script and Enset\\_Xvm\\_data](#)) which contains a full description of data mana  
238 gement and analysis.

239 Generalized linear hypothesis testing, adjusted for multiple comparisons using Tukey’s method  
240 (Hothorn et al., 2008), was used to assess statistically significant differences at *P*-value cut-off of  
241 0.05. Statistical significance among treatments was determined using the “compact letter displays  
242 (cld)” method in the graphic visualization; *cld* function from *multcomp* (Hothorn et al., 2008)  
243 package. Treatments within the same “letter group” are not significantly different whereas  
244 treatments with different letters display a significant difference.

245

246 **3. Results**

247 3.1. Hypersensitivity and pathogenicity tests

248 A typical hypersensitive response (HR) was observed on tobacco leaves from both of uncultured  
249 and medium based Xvm suspension. However, uncultured Xvm suspension caused a severe HR  
250 on tobacco within three days post inoculation whereas symptoms were delayed for up to eight days  
251 when cultured Xvm was used (data not shown). The effect of inoculum type on symptom  
252 appearance was more pronounced during pathogenicity testing on the susceptible landrace Arkia.  
253 It took 21 days after inoculation (DAI) with uncultured Xvm suspension to cause wilting and  
254 complete collapse of enset leaves of the susceptible landrace Arkia whereas the same disease level  
255 was not attained in the cultured suspension inoculation until 30 to 45 DAI.

256 3.2. Symptom description

257 A range of symptoms was observed during the course of infection and subsequent disease  
258 development on Xvm-challenged enset landraces. Necrosis around the point of inoculation and  
259 surrounding tissues was observed 3 DAI in most landraces (Figure 3). At early stages of infection,  
260 up to 15 DAI, landraces showed a varying range of symptoms. Included among these symptoms  
261 were twisting and slight leaf curling, and drooping of the blade and tip of the inoculated leaf. The  
262 leaf blade around the Xvm inoculated area often became deformed, twisted or curving inwards.  
263 These symptoms were replaced by severe curling of the leaf edge, drooping and folding back of  
264 leaf blade from 15 DAI, symptoms that were consistently observed in all landraces. Gradually,  
265 drooping from the leaf apex and folding back or collapsing of leaves became the most prominent  
266 symptoms as the disease developed. All tested enset landraces showed one or more these  
267 symptoms.



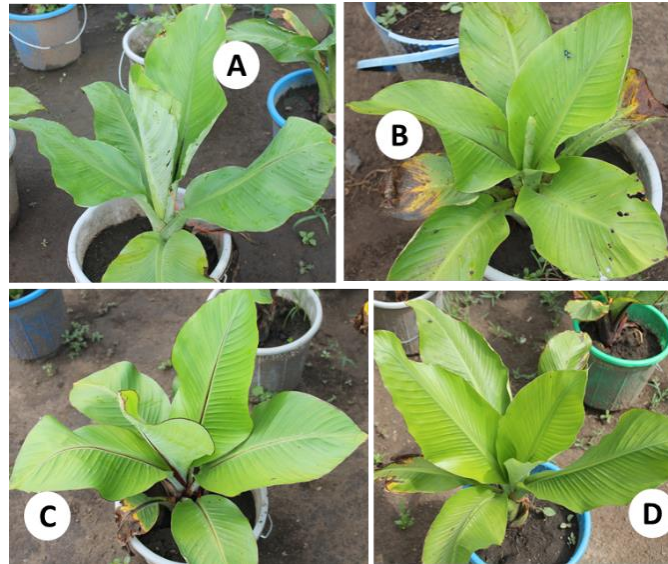

268

269 Figure 3. Xvm infection symptoms during the early stage of disease development on enset  
270 landraces. Labels are placed near to Xvm infected leaves. A) Curling of inoculated leaf, B)  
271 Twisting of inoculated leaf, C) Drooping of leaf apex of infected and other leaves and D) Folding  
272 around point of inoculation.

273 On severely infected enset landraces such as Dirbo and Arkia (susceptible control), the symptoms  
274 further developed into yellowing of leaves starting from leaf apex, and then gradual collapsing and  
275 clear wilting of the inoculated leaf and spreading the symptoms to other leaves. Eventually the  
276 whole leaves wilt, leading to their death and subsequent rotting of the whole plant (Figure 3A).  
277 However, on landraces that showed mild infection symptoms, for example Lemat and the  
278 resistant/tolerant control, Mazia, the inoculated leaf collapses and then dries (reminiscent of a  
279 classical hypersensitive response) or the symptoms extended to just a few adjacent leaves and the  
280 whole plant remains green afterward (Figure 4B). During the study period, a classical HR or HR-  
281 like symptoms were not observed in all of tested enset landraces.

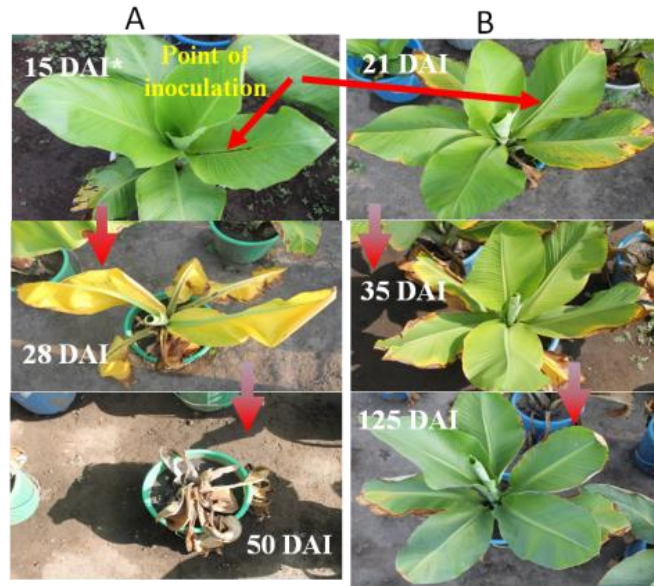

282

283 Figure 4. Comparison of Xvm disease symptoms on onset landraces. Development of Xvm disease  
284 symptoms on the susceptible onset landrace Dirbo (A) contrasted to the resistant/tolerant landrace  
285 Mazia (B). \*DAI= Days after inoculation.

#### 286 3.4. Area under disease progress stairs (AUDPS)

287 Plot of the area under disease progress stairs showed more or less distinct curves and disease build-  
288 up for the tested 20 onset landraces (Figure 5A). Analysis of AUDPS also showed a spectrum of  
289 significant differences ( $P < 0.05$ ) among landraces with landrace Arkia having the highest and  
290 Hae'la the lowest AUDPS value (Figure 5B). In addition, the analysis revealed that landraces could  
291 be grouped to fewer clusters based on their AUDPS values; those at lower tail, middle to upper  
292 tail, the last landrace Arkia that showed the peak AUDPS value.

293

294 3.5. Disease Index and apparent infection rate

295 Disease severity expressed as unit of DI illustrated the progress of disease development of Xvm  
296 infection in the 20 enset landraces. Apparent Infection Rate (AIR) calculates the rate of disease  
297 index development as a function of slope at each disease evaluation period (See Material and  
298 Methods). Analysis of variance of both the DI and AIR showed marked differences ( $P < 0.05$ )  
299 between landraces (Table 2).

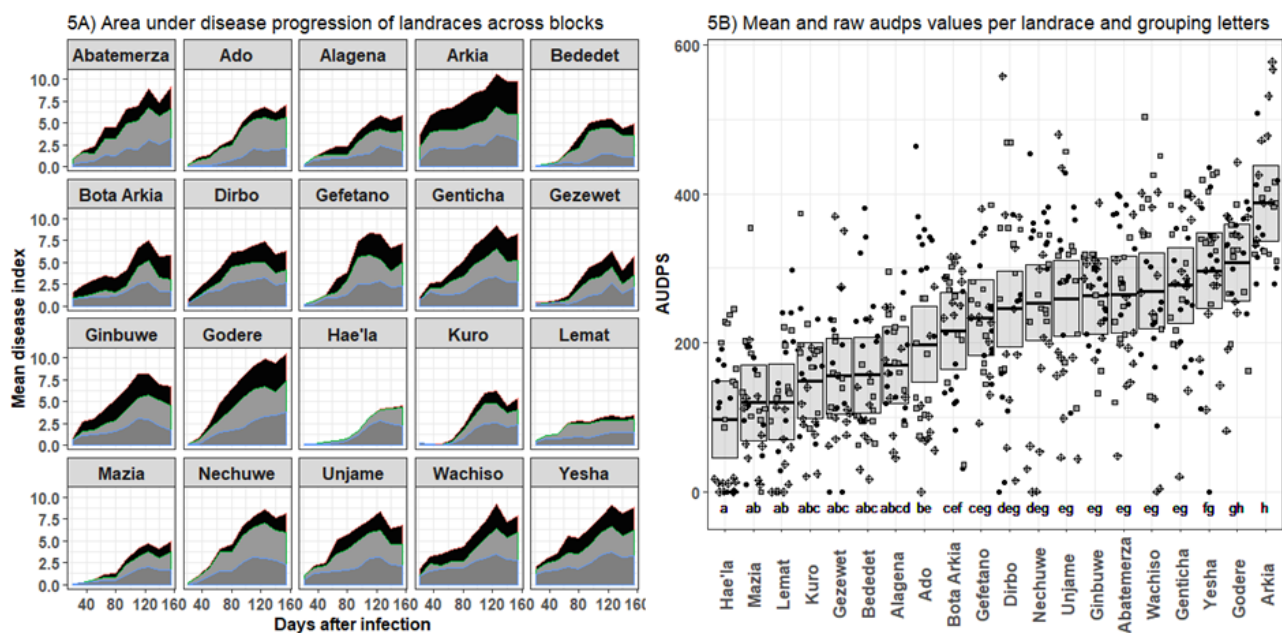

300

301 Figure 5. Area under the disease progression stairs (AUDPS) for 20 the landraces following  
302 controlled inoculation with Xvm. (A) Disease progression curve of tested enset landraces across  
303 blocks. The area under curve for each replicate in landrace represented by three shades of gray in  
304 each landrace. (B) Means (thick horizontal lines) and 95% confidence intervals (CIs) (shaded  
305 boxes) of the AUDPS values as estimated by a linear mixed effects model. Calculated areas for all  
306 individuals are plotted, with symbols indicating different replicates. The compact letter display  
307 above the landrace names indicates the results of multiple comparison tests using of means

308 AUDPS using Tukey's method at  $P < 0.05$ . Enset landraces with similar letters are statistically not  
309 different from each other and vice versa.

310 Table 2. Analysis of variance for area under disease progress stairs, disease index and apparent  
311 infection rate of the twenty enset landraces infected with enset bacterial wilt disease.

|                                            | Degrees of freedom | Sum squares           | Mean squares          | F value   |
|--------------------------------------------|--------------------|-----------------------|-----------------------|-----------|
| Area Under Disease Progress Stairs (AUDPS) |                    |                       |                       |           |
| Landrace                                   | 19                 | 3,176,321             | 167,175               | 19.29 *** |
| Disease Index (DI)                         |                    |                       |                       |           |
| Landrace                                   | 19                 | 573                   | 30                    | 37.90 *** |
| Apparent Infection Rate (AIR)              |                    |                       |                       |           |
| Landrace                                   | 19                 | $1.04 \times 10^{-3}$ | $5.5 \times 10^{-4}$  | 7.18 ***  |
| Residuals                                  | 578                | 0.044                 | $7.63 \times 10^{-5}$ |           |

312 Mean DI values ranged from 0.65, 0.80, 0.81 in Hae'la, Mazia and Lemat respectively,  
313 corresponding to 16.25%, 20.00%, 20.25% severity. This contrasted with DI values of 1.98  
314 (49.50%), 2.05 (51.25%), and 2.59 (64.75%) in Yesha, Godere and Arkia, respectively, (Table 3).  
315 As evidenced from the lowest AIR, disease development rate is the slowest in landrace Lemat, and  
316 fastest in Genticha, Abatemerza, Nechuw, Gefetano and Godere. Interestingly, AIR did not show  
317 a direct linear relationship with disease index suggesting that AIR varies among enset landraces  
318 irrespective of disease severity of landraces as measured by DI.

319

320 Table 3. Mean of disease index and apparent infection rates of Xvm on 20 enset landraces with  
321 their standard error values.

| Landraces  | Disease index | cld <sup>1</sup> | Apparent infection rate (AIR) | cld <sup>2</sup> |
|------------|---------------|------------------|-------------------------------|------------------|
| Hae'la     | 0.65 ± 0.06   | a                | 1.3x10 <sup>-2</sup> ± 0.002  | ac               |
| Mazia      | 0.80 ± 0.06   | ab               | 1.4 x10 <sup>-2</sup> ± 0.002 | acd              |
| Lemat      | 0.81 ± 0.05   | ab               | 0.7 x10 <sup>-2</sup> ± 0.002 | a                |
| Kuro       | 1.00 ± 0.06   | ac               | 1.7 x10 <sup>-2</sup> ± 0.002 | bce              |
| Gezewet    | 1.04 ± 0.07   | acd              | 1.6 x10 <sup>-2</sup> ± 0.002 | bce              |
| Bededet    | 1.05 ± 0.06   | acd              | 1.5 x10 <sup>-2</sup> ± 0.002 | ae               |
| Alagena    | 1.14 ± 0.06   | bcd              | 1.5 x10 <sup>-2</sup> ± 0.002 | ae               |
| Ado        | 1.32 ± 0.08   | ce               | 1.9 x10 <sup>-2</sup> ± 0.002 | bce              |
| Bota Arkia | 1.44 ± 0.06   | def              | 1.3 x10 <sup>-2</sup> ± 0.002 | ab               |
| Gefetano   | 1.56 ± 0.08   | ef               | 2.2 x10 <sup>-2</sup> ± 0.002 | def              |
| Dirbo      | 1.64 ± 0.08   | efg              | 1.4 x10 <sup>-2</sup> ± 0.002 | ae               |
| Nechuwe    | 1.69 ± 0.09   | eh               | 2.2 x10 <sup>-2</sup> ± 0.002 | ef               |
| Unjame     | 1.73 ± 0.07   | fh               | 1.6 x10 <sup>-2</sup> ± 0.002 | bce              |
| Ginbuwe    | 1.76 ± 0.06   | fh               | 1.6 x10 <sup>-2</sup> ± 0.002 | bce              |
| Abatemerza | 1.77 ± 0.08   | fh               | 2.1 x10 <sup>-2</sup> ± 0.002 | cef              |
| Wachiso    | 1.80 ± 0.08   | fh               | 1.6 x10 <sup>-2</sup> ± 0.002 | bce              |
| Genticha   | 1.85 ± 0.07   | fh               | 2.0 x10 <sup>-2</sup> ± 0.002 | bcef             |
| Yesha      | 1.98 ± 0.07   | gh               | 1.8 x10 <sup>-2</sup> ± 0.002 | bce              |
| Godere     | 2.05 ± 0.09   | h                | 2.8 x10 <sup>-2</sup> ± 0.002 | f                |
| Arkia      | 2.59 ± 0.06   | i                | 1.5 x10 <sup>-2</sup> ± 0.002 | ae               |

322 cld<sup>1</sup> and cld<sup>2</sup> are compact letter display of the result of multiple comparison tests using of means  
323 of disease index and apparent infection rate using Tukey's method p<0.05. Enset landraces with  
324 similar letters are statistically not different from each other and vice versa.

325

326 3.6 Survival Analysis

327 A DI of  $\geq 2.23$  was used as a time-to-event cutoff point for survival analysis. This cut-off DI is  
328 the peak of infection level of the resistant/tolerant control enset landrace “Mazia”. The survival  
329 data generated with the `survfit` function of the survival package against landraces stratified by  
330 block, best fitted a Gaussian distribution that showed the minimum AIC and BIC values (Table 4)  
331 among Weibull, Logistic, Lognormal distributions. The linear fit of survival showed non-  
332 proportionality of hazard ratio and, alternatively, data fitted to a mixed effects Cox model for  
333 subsequent comparison of estimates ([supplementary R\\_script](#)).

334 Table 4. Summary of survival data fit to different distributions

| Survival fit to distribution | Degree of freedom | AIC     | BIC     |
|------------------------------|-------------------|---------|---------|
| Weibull                      | 21                | 19216.0 | 19356.7 |
| Gaussian                     | 21                | 19176.7 | 19317.4 |
| Logistic                     | 21                | 19220.8 | 19361.4 |
| Lognormal                    | 21                | 19646.7 | 19787.4 |

335 Enset landraces displaying mild and severe infection to Xvm only showed significant estimates of  
336 hazard ratio (HR) and Gaussian distribution (Table 5). Lemat, Hae'la and Mazia had estimated  
337 hazard ratios of 0.230, 0.272 and 0.294, respectively, indicative of a mild infection to Xvm. This  
338 result indicates that for landraces Lemat, Hae'la and Mazia there is, respectively, an 87.0%, 86.8%,  
339 80.6% decrease in risk of getting severely infected with Xvm higher than disease index (DI) value  
340 of  $\geq 2.23$  which was taken as a cutoff point. The susceptible control landrace Arkia included in  
341 this study showed an estimated hazard ration of 1.866 that suggests 86.6% higher risk of showing  
342 sever infection higher than DI value  $\geq 2.23$  after challenged with Xvm.

343 Table 5. Result of Cox model and fit to Gaussian distribution of disease index of enset landraces

| Enset landraces | Mean disease index | Hazard ratio (coxme <sup>1</sup> ) | Hazard ratio (coxme) | Gaussian distribution |
|-----------------|--------------------|------------------------------------|----------------------|-----------------------|
|                 |                    |                                    | <i>P</i> value       | <i>P</i> value        |
| Hae'la          | 0.65               | 0.272                              | <0.0001              | <0.0001               |
| Mazia           | 0.80               | 0.294                              | <0.0001              | <0.0001               |
| Lemat           | 0.81               | 0.230                              | <0.0001              | <0.0001               |
| Kuro            | 1.00               | 0.441                              | <0.0001              | <0.0001               |
| Bededet         | 1.04               | 0.403                              | <0.0001              | <0.0001               |
| Gezewet         | 1.04               | 0.410                              | <0.0001              | <0.0001               |
| Alagena         | 1.14               | 0.435                              | <0.0001              | <0.0001               |
| Ado             | 1.32               | 0.626                              | 0.0024               | 0.0143                |
| Bota Arkia      | 1.44               | 0.564                              | 0.0003               | 0.002                 |
| Gefetano        | 1.56               | 0.871                              | 0.330                | 0.692                 |
| Dirbo           | 1.64               | 1.013                              | 0.930                | 0.060                 |
| Nechuwe         | 1.69               | 1.102                              | 0.470                | 0.249                 |
| Unjame          | 1.73               | 0.966                              | 0.800                | 0.331                 |
| Ginbuwe         | 1.75               | 1.001                              | 1.000                | 0.687                 |
| Abatemerza      | 1.77               | NA                                 | NA                   | NA                    |
| Wachiso         | 1.80               | 1.070                              | 0.620                | 0.107                 |
| Genticha        | 1.85               | 1.164                              | 0.250                | 0.108                 |
| Yesha           | 1.98               | 1.331                              | 0.027                | 0.002                 |
| Godere          | 2.05               | 1.505                              | 0.0013               | 0.002                 |
| Arkia           | 2.59               | 1.866                              | <0.0001              | <0.0001               |

344 <sup>1</sup> mixed effects Cox model

345 A survival fit to Gaussian distribution revealed that a higher proportion of plants survive from  
346 landraces that showed mild infection than those landraces that showed severe infection (see peak  
347 disease index) during the course of disease development (Figure 6). For example, right after 95  
348 days post inoculation 50% of landrace Arkia was estimated to have experienced little probability  
349 of surviving whereas for Lemat, Hae'la and Mazia at this time point it was less than 7%.

Muzemil et al. Submitted to European Journal of Plant Pathology

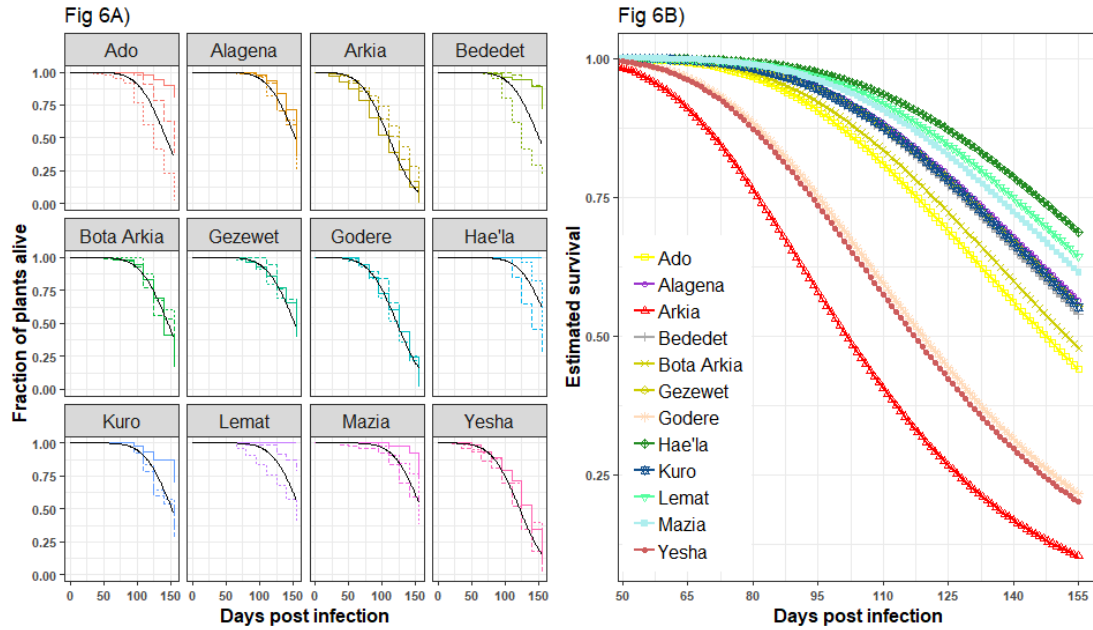

350  
351  
352  
353  
354  
355  
356  
357  
358

Figure 6. Kaplan-Meier estimates of survival and fits produced by survival regression analysis for disease index of the 12 enset landraces that fitted to Gaussian distribution. Landraces that showed non-significant values for hazard ratio and Gaussian distribution were omitted in this display. 6a) Kaplan-Meier survival estimates for individual landrace with different linetypes indicating experimental replicates. 6b) Combined display of Kaplan-Meier survival estimates for the 12 enset landraces. The event of interest was defined as a disease index of 2.23.



359 **4. Discussion**

360 The bacterial wilt disease caused by *Xanthomonas vasicola* pv. *musacearum* (formerly *X.*  
361 *campestris* pv. *musacearum*) is a major bottleneck to enset (*Ensete ventricosum*) cultivation in  
362 south and southwestern Ethiopia, where diverse enset landraces and wild types of the crop are  
363 found. Farmers traditionally adopted host plant resistance as a management option for this bacterial  
364 wilt disease by incorporating certain landraces perceived to be more resistant/tolerant to Xvm  
365 (Ashagari, 1985; Yemataw et al., 2017). Several studies have indicated the presence of enset  
366 landraces that show low level of susceptibility to Xvm (Ashagari, 1985; Archaido and Tessera,  
367 1993; Handoro and Welde-Michael, 2007; Welde-Michael et al., 2008; Haile et al., 2014;  
368 Hunduma, 2015; Wolde *et al.*, 2016; Handoro and Said, 2016).

369 To date there has been no systematic comparison of enset landraces' responses to Xvm infection  
370 in a common environment with a consistent inoculum. This detailed and, by nature of enset  
371 propagation, time consuming study undertook a detailed assessment of disease development on  
372 enset landraces previously reported for their low susceptibility to Xvm with the objective of  
373 gaining a definitive insight into Xvm disease phenotypes on enset landraces with the future  
374 objective of identifying suitable landraces to study the underlying molecular components of Xvm  
375 resistance. Characterisation of early infection symptoms through to the percentage of symptomatic  
376 leaves at each evaluation stage were considered. Various parameters such as area under disease  
377 progress stairs, disease index, apparent infection rate and survival rate were incorporated into  
378 detailed statistical analyses.

379 A limitation of this study was the unavailability of a standard stock of virulent inoculum. Given  
380 the constraints of available infrastructure in the geographic region of this study, the only practical

381 possibility was to use freshly harvested inoculum from already infected plants. This approach was  
382 validated though preliminary experiments demonstrating that culturing the bacteria resulted in a  
383 significant attenuation of virulence (based on HR in tobacco and symptoms on Arki); therefore,  
384 uncultured inoculum (i.e. bacterial suspension derived directly from bacterial ooze of infected  
385 plants) was used. Most previous enset-Xvm interaction studies have used Xvm isolates from  
386 disease hot-spot areas in southern Ethiopia in the District of Hagera Selam where highly virulent  
387 Xvm isolates were identified by Handoro and Welde-Michael (2007), based upon the observation  
388 that the tolerance/resistant landrace Mazia showed comparatively higher-level of infection to Xvm  
389 from Hager Selam districts than isolates from four other districts. However, comprehensive studies  
390 on classical and molecular epidemiology on diverse Xvm strains from enset growing areas in  
391 Ethiopia is required, and is currently underway, to identify virulent Xvm strains for future breeding  
392 efforts. Comparison of results between different studies has been hampered by the inevitable  
393 variability between batches of freshly collected inoculum. However, within our present study, we  
394 used a single uniform batch of inoculum, simultaneously inoculating all plants, thus eliminating  
395 such confounding batch effects.

396 The majority of vascular pathogens, including Xvm, manifest wilting symptom in their host after  
397 infection. Yet, even in well developed model systems, knowledge of the underlying infection  
398 mechanisms remain poorly resolved. Despite such challenges, it is important to understand the  
399 temporal spatial development of symptoms from initial visible phenotypes to the actual wilting  
400 and subsequent death. Furthermore, it is important to understand how different closely related  
401 genotypes respond to the same Xvm challenge. In this study we show that during early stages of  
402 Xvm infection on enset landraces, i.e. up to 15 days after inoculation, a range of transient  
403 symptoms were observed, including twisting and leaf curling, and drooping of the leaf blade and

404 apex. Symptoms associated with wilting, clear folding or collapsing of leaf blade, severe drooping  
405 from leaf apex and wilting tended to appear from the third week following Xvm infection. Thus,  
406 for robustness of scoring, analyses were restricted to disease data gathered from the third week  
407 onwards.

408 This study revealed HR-like symptoms in a limited number of Xvm challenged enset landraces,  
409 reminiscent of that seen in resistance-gene mediated HR. This raises the possibility that disease  
410 classical resistance genes are deployed in restricting Xvm ingress. Involvement of HR cannot be  
411 excluded even in those landraces that do not show HR-like symptoms; evidence suggests that local  
412 resistant gene mediated reactions can also manifest as cellular changes contributing to wilting  
413 (Jakobek and Lindgren, 1993; Chasan, 1994; Pajerowska-Mukhtar and Dong, 2009). All 20 tested  
414 enset landraces showed at least partial symptoms of Xvm infection at different times of assessment  
415 while mock infected plants were asymptomatic during the course of evaluation. Destructive  
416 bacterial multiplication was not assessed at each disease evaluation stage, but rather the focus was  
417 to distinguish symptoms associated with disease and potential symptoms associated with an  
418 immune response. However, it is important to note that resistant plants also display a low level of  
419 infection symptoms as reported in several crops. Indeed, bacterial enumeration of most classical  
420 gene-for-gene interactions demonstrate a low level of accumulation of the pathogen until effective  
421 resistance sets in and this is probably reflected in the weak phenotypes recorded in these landraces.  
422 Previous reports which claim a lack of complete immunity to Xvm infection in enset due to the  
423 presence of some level of infection in tested landraces (Archaido and Tessera, 1993; Handoro and  
424 Welde-Michael, 2007; Welde-Michael et al., 2008; Haile et al., 2014; Hunduma, 2015; Wolde *et*  
425 *al.*, 2016; Handoro and Said, 2016) probably highlight the challenge in deploying effective  
426 resistance to a vascular pathogen compared to a more classical foliar infection.

Muzemil et al. Submitted to European Journal of Plant Pathology

427 Analysis of area under disease progress stairs and disease index discriminated those enset  
428 landraces with lower and higher level of infection, identifying elite landraces for further studies.  
429 Accordingly, landrace Hae'la, Mazia and Lemat showed markedly lower susceptibility to Xvm  
430 where as Yesha, Godere and Arkia were significantly more susceptible. Apparent infection rates  
431 indicated that disease development was slowest in Lemat and fastest in Yesha compared to the  
432 other landraces.

433 Complementing these results, survival analysis provided insight into the inherent infection risk.  
434 Inoculations leading to a cutoff disease index value of  $\geq 2.23$  corresponded to 55.75% disease  
435 incidence. The maximum disease value recorded was from the resistant control landrace Mazia  
436 and this was used as a reference in the survival analysis. The significant difference in proportional  
437 hazard model and Kaplan-Meier estimates of survival time demonstrated the variation in gross  
438 impact of Xvm in different enset landraces. Analysis of the hazard ratio suggested 2.4 to 3.9 fold  
439 changes in the resistance/susceptibility of landrace to disease caused by Xvm. Survival analysis  
440 suggested a higher proportion of landraces from Hae'la would be estimated to survive after Xvm  
441 infection followed by Lemat and Mazia whereas most plants in landrace Areki would succumb to  
442 Xvm infection, followed by landraces Yesha and Godere.

443 This study confirmed the lower level of susceptibility of previously reported enset landraces to  
444 Xvm infection after subjecting the landraces to a longer infection period, undertaking in parallel a  
445 detail account of symptomologies and rigorous analysis of disease data. It is important to mention  
446 that there is a great deal of evidence of sharing vernacular of enset landraces within and in  
447 neighboring enset growing districts in Ethiopia (Olango et al, 2015; Yemataw et al., 2014; 2016)  
448 that might not be phenotypical or genetically identical. For example, Olango et al. (2015) revealed  
449 by Simple Sequence Repeat based genetic diversity analysis that two enset landraces with identical

450 vernaculars ‘Gena’ from Wolaita and Sidama zones in Southern Ethiopia were genetically distinct.  
451 Furthermore, genome-wide comparison of SNP data from the landrace Mazia sourced from Dawro  
452 and Wolaita zones of Southern Ethiopia revealed different SNP profiles (Yemataw *et al.*, 2018).  
453 Thus, care needs to be taken when identifying enset landraces for study as variation in the reaction  
454 of landraces with identical or similar vernaculars might not be only due to the variation in virulence  
455 of Xvm isolates or environmental factor but also due to of the presence possible homonym enset  
456 landraces.

457 Most of the landraces that showed higher tolerance/resistance to Xvm infection viz. Hae’la, Mazia,  
458 Lemat, Kuro, Bededet, and Gezewet originated from areas where landrace enset landrace diversity  
459 is richer with a high number of unique landraces present (Yemataw *et al.*, 2014; 2016). These  
460 areas are the Dawro (landrace Mazia and Kurro), Kembata (landrace Hea’la), and Gurage (landrace  
461 Lemat, Bededet, and Gezewet) districts of southern Ethiopia. The recent disease pressure in these  
462 districts is comparatively higher than other enset growing areas in southern Ethiopia except for  
463 Kembata Tembaro district (SARI-McKnight CCRP, 2013; and personal observation by Sadik  
464 Muzemil). Furthermore, these areas also reside along the belts of the initial discovery of Xvm by  
465 Castellani (1939) in southern Ethiopia. Hence, we hypothesize that the co-existence of Xvm with  
466 these enset might have contributed to evolution of landraces with lower susceptibility to Xvm  
467 infection.

468 Enset landraces with lower susceptibility to Xvm identified in this study i.e landraces Hae’la,  
469 Lemat and Mazia, along with highly susceptible landraces provide the foundation for further  
470 testing in multi-stage and environment conditions in order to better understand the underpinning  
471 resistance/tolerance components. We note that it is important that not only the source of landraces,  
472 but also the pathogen inoculum need to be considered for future studies.

473 Acknowledgement

474 The authors would like to thank McKnight Foundation Collaborative Research Program and the  
475 European Community Horizon 2020 grant Project ID 727624, “Microbial uptakes for sustainable  
476 management of major banana pests and diseases (MUSA) for financial and technical support. We  
477 thank Areka and Hawassa Agricultural Research Centers, Southern Agricultural Research Institute  
478 and Ethiopian Agricultural Research Institute for hosting and provision of germplasm as well as  
479 necessary services and facilities during field study. We are indebted to School of plant and  
480 horticultural science of Hawassa University for hosting the study, undertaken as part of SM’s MSc  
481 research work.

482 Compliance with Ethical Standards’

483 The authors would like to undertake that all authors listed have contributed sufficiently to the  
484 project to be included as authors. To the best of our knowledge, no conflict of interest, financial  
485 or other, exists. We have included acknowledgements, conflicts of interest, and funding sources  
486 after the discussion.

487 **6. References**

- 488 Allaire, J.J., Xie, Y., McPherson, J., Luraschi, J., Ushey, K., Atkins, A., Wickham, H., Cheng, J.,  
489 Chang, W. and Iannone, R. (2019). *rmarkdown*: Dynamic Documents for R. R package  
490 version 1.13. doi: <https://rmarkdown.rstudio.com>
- 491 Azerefegne F.; Addis, T.; Alemu, T.; Lemawork, S.; Tadesse, E.; Gemu, M.; Blomme, G.  
492 (2009). An IPM guide for enset root mealybug (*Cataenococcus ensete*) in enset production.  
493 (V. Johnson, Ed.). Bioversity International. doi:  
494 [https://www.bioversityinternational.org/index.php?id=244&tx\\_news\\_pi1%5Bnews%5D=12](https://www.bioversityinternational.org/index.php?id=244&tx_news_pi1%5Bnews%5D=1209&tx_news_pi1%5Bcontroller%5D=News&tx_news_pi1%5Baction%5D=detail&cHash=87494e2eaf2d7f63a3c149c12bd330b1)  
495 [09&tx\\_news\\_pi1%5Bcontroller%5D=News&tx\\_news\\_pi1%5Baction%5D=detail&cHash=](https://www.bioversityinternational.org/index.php?id=244&tx_news_pi1%5Bnews%5D=1209&tx_news_pi1%5Bcontroller%5D=News&tx_news_pi1%5Baction%5D=detail&cHash=87494e2eaf2d7f63a3c149c12bd330b1)  
496 [87494e2eaf2d7f63a3c149c12bd330b1](https://www.bioversityinternational.org/index.php?id=244&tx_news_pi1%5Bnews%5D=1209&tx_news_pi1%5Bcontroller%5D=News&tx_news_pi1%5Baction%5D=detail&cHash=87494e2eaf2d7f63a3c149c12bd330b1)
- 497 Anita, S.H.C., Taboge E., and Woldemichael, G. 1996. Enset Need Assessment Project. Phase I  
498 Report. Awassa, Ethiopia.
- 499 Archido, A.J. and Tezera, M. 1993. Diseases of Enset. An overview on enset research and future  
500 technological needs for enhancing its production and utilization. *In*: Tsedeke, A., Hiebisch,  
501 C., Brandt, S.A. and Seifu Gebremariam (eds.) Enset Based Sustainable Agriculture in  
502 Ethiopia. Proceedings from the International Workshop on enset held in Addis Ababa, 13-20  
503 December, pp. 3-12. doi: <http://hdl.handle.net/123456789/1047>
- 504 Ashagari. D. 1981. Studies on Bacterial Wilt of Enset. Paper Presented at the 13<sup>th</sup> National Crop  
505 Improvement Conference. Addis Ababa, Ethiopia. 23-25 March 1981. IAR, Ethiopia.
- 506 Ashagari. D. 1985. Studies on the Bacterial Wilt of Ensat (*Ensete ventricosum*) and Prospects for  
507 its Control. *Eth J Agric Sci.* 7(1): 1-14. doi: [http://agris.fao.org/agris-](http://agris.fao.org/agris-search/search.do?recordID=ET2010000090)  
508 [search/search.do?recordID=ET2010000090](http://agris.fao.org/agris-search/search.do?recordID=ET2010000090)
- 509 Bache, S.M., & Wickham, H. (2014). *magrittr*: A Forward-Pipe Operator for R. R package version

- 510 1.5. doi: <https://CRAN.R-project.org/package=magrittr>
- 511 Bates, D., Mächler, M., Bolker, B., & Walker, S. (2015). Fitting Linear Mixed-Effects Models  
512 using lme4. *Journal of Statistical Software*. doi: 10.18637/jss.v067.i01
- 513 Befekadu, H., Girma, A., & Fikre, H. (2014). Physiological characteristics and pathogenicity of  
514 *Xanthomonas campestris* pv. *musacearum* strains collected from enset and banana in  
515 Southwest Ethiopia. *African Journal of Biotechnology*, 13(24), 2425–2434.  
516 doi:10.5897/AJB2014.13794
- 517 Blomme, G., Dita, M., Jacobsen, K. S., Pérez Vicente, L., Molina, A., Ocimati, W., et al. (2017).  
518 Bacterial Diseases of Bananas and Enset: Current State of Knowledge and Integrated  
519 Approaches Toward Sustainable Management. *Frontiers in Plant Science*, 8(1290), 1–23.  
520 doi:10.3389/fpls.2017.01290
- 521 Bogale, M., Speijer, P. R., Mekete, T., Tessera, M., & Gold, C. (2004). Survey of plant parasitic  
522 nematodes and banana weevil on *Ensete ventricosum* in Ethiopia. *Nematologia Mediterranea*,  
523 32, 223–227. doi: <https://journals.flvc.org/nemamedia/article/view/86797>
- 524 Borrell, J. S., Biswas, M. K., Goodwin, M., Blomme, G., Schwarzacher, T., Heslop-Harrison, J.  
525 S. (Pat), et al. (2019). Enset in Ethiopia: a poorly characterized but resilient starch staple.  
526 *Annals of Botany*, 123(5), 747–766. doi:10.1093/aob/mcy214
- 527 Brandt, S., Spring, A., Hiebsch, C., McCabe, J. T., Tabogie, E., Wolde-Michael, G., et al. (1997).  
528 The “Tree against hunger.” Enset based agricultural systems in Ethiopia. American  
529 Association for Advancement of Science with Awassa Agricultural Research Center, Kyoto  
530 University center for African Areas Studies and University of Florida. Directorate for  
531 International programs 1200 New York Avenue, NW, Washington, DC 20005. 56pp doi :  
532 <http://hdl.handle.net/123456789/1284>
- 533 Chasanm R. (1994). Disease resistance: Beyond the R genes, 6, 461–463. doi:10.1105/tpc.6.4.461



Muzemil et al. Submitted to European Journal of Plant Pathology

- 534 Ekstrøm, C.T. (2019). *MESS: Miscellaneous Esoteric Statistical Scripts*. R package version 0.5.5.  
535 doi : <https://CRAN.R-project.org/package=MESS>
- 536 Haile, B., Adugna, G., & Handoro, F. (2014). Physiological characteristics and pathogenicity of  
537 *Xanthomonas campestris* pv. *musacearum* strains collected from enset and banana in  
538 Southwest Ethiopia. *African Journal of Biotechnology*, 13(24), 2425–2434.  
539 doi:10.5897/AJB2014.13794
- 540 Handoro, F., & Michael, G. W. (2007). Evaluation of enset clone meziya against enset bacterial  
541 wilt. *8th African Crop Science Society Conference*, El-Minia, Egypt, 27-31 October 2007, 8,  
542 887–890. doi : <https://www.cabdirect.org/cabdirect/abstract/20103268232>. Accessed 12  
543 August 2018
- 544 Handoro, F., & Said, A. (2016). Enset clones responses to bacterial wilt disease (*Xanthomonas*  
545 *campestris* pv. *musacearum* ). *International Journal of Applied and Pure Science and*  
546 *Agriculture (IJAPSA)* , 02(09), 45–53. doi: [https://ijapsa.com/published-papers/volume-](https://ijapsa.com/published-papers/volume-2/issue-9/enset-clones-responses-to-bacterial-wilt-disease-xanthomonas-campestris-pv-musacearum.pdf)  
547 [2/issue-9/enset-clones-responses-to-bacterial-wilt-disease-xanthomonas-campestris-pv-](https://ijapsa.com/published-papers/volume-2/issue-9/enset-clones-responses-to-bacterial-wilt-disease-xanthomonas-campestris-pv-musacearum.pdf)  
548 [musacearum.pdf](https://ijapsa.com/published-papers/volume-2/issue-9/enset-clones-responses-to-bacterial-wilt-disease-xanthomonas-campestris-pv-musacearum.pdf). Accessed 13 August 2018
- 549 Harrell Jr, F. E. (2019). *rms: Regression Modeling Strategies*. R package version 5.1-3.1. doi:  
550 <https://CRAN.R-project.org/package=rms>
- 551 Hlavac, M. (2018). *stargazer: Well-Formatted Regression and Summary Statistics Tables*. R  
552 package version 5.2.1. doi: <https://CRAN.R-project.org/package=stargazer>
- 553 Hothorn, T., Bretz, F., & Westfall, P. (2008). Simultaneous Inference in General Parametric  
554 Models. *Biometrical Journal*, 50(3), 346–363. doi:10.1002/bimj.200810425
- 555 Hunduma, T. (2015). Evaluation of Enset Clones Resistance against Enset Bacterial Wilt Disease,  
556 6(3). doi:10.4172/2157-7579.1000232
- 557 Jakobek, J. L., & Lindgren, P. B. (1993). Generalized Induction of Defense Responses in Bean Is

- 558 Not Correlated with the Induction of the Hypersensitive Reaction. *The Plant cell*. 5:49-56.  
559 doi: <https://doi.org/10.1105/tpc.5.1.49>
- 560 Kuznetsova, A., Brockhoff, P., & Christensen, R. (2017). *lmerTest* Package: Tests in Linear Mixed  
561 Effects Models. *Journal of Statistical Software* 82:(13), 1-26. doi: 10.18637/jss.v082.i13
- 562 Lenth, R. (2019). *emmeans*: Estimated Marginal Means, aka Least-Squares Means. R package  
563 version 1.3.4. doi: <https://CRAN.R-project.org/package=emmeans>
- 564 Mangiafico, S. (2019). *rcompanion*: Functions to Support Extension Education Program  
565 Evaluation. R package version 2.2.1. doi: <https://CRAN.R-project.org/package=rcompanion>
- 566 Meena, P. D., Chattopadhyay, C., Meena, S. S., & Kumar, A. (2011). Area under disease progress  
567 curve and apparent infection rate of alternaria blight disease of indian mustard (*Brassica*  
568 *juncea*) at different plant age. *Archives of Phytopathology and Plant Protection*, 44(7), 684–  
569 693. doi:10.1080/03235400903345281
- 570 Nakato, V., Mahuku, G., & Coutinho, T. (2018). *Xanthomonas campestris* pv. *musacearum*: a  
571 major constraint to banana, plantain and enset production in central and east Africa over the  
572 past decade. *Molecular Plant Pathology*, 19(3), 525–536. doi:10.1111/mpp.12578
- 573 Nurfeta, A., Eik, L. O., Adugna Tolera, & Sundstøl, F. (2008). Chemical composition and in sacco  
574 dry matter degradability of different morphological fractions of 10 enset (*Ensete ventricosum*)  
575 varieties. *Animal Feed Science and Technology*, 146(1–2), 55–73.  
576 doi:10.1016/j.anifeedsci.2007.12.003
- 577 Ocimati, W., Bouwmeester, H., Groot, J. C. J., Tiftonell, P., Brown, D., & Blomme, G. (2019).  
578 The risk posed by *Xanthomonas* wilt disease of banana: Mapping of disease hotspots, fronts  
579 and vulnerable landscapes. *PLoS ONE*. doi:10.1371/journal.pone.0213691
- 580 Olango, T. M., Tesfaye, B., Catellani, M., & Pè, M. E. (2014). Indigenous knowledge, use and on-  
581 farm management of enset (*Ensete ventricosum* (Welw.) Cheesman) diversity in Wolaita,

Muzemil et al. Submitted to European Journal of Plant Pathology

- 582 Southern Ethiopia. *Journal of ethnobiology and ethnomedicine*, 10(1), 41. doi:10.1186/1746-  
583 4269-10-41
- 584 Olango, T. M., Tesfaye, B., Pagnotta, M. A., Pè, M. E., & Catellani, M. (2015). Development of  
585 SSR markers and genetic diversity analysis in enset (*Ensete ventricosum* (Welw.) Cheesman),  
586 an orphan food security crop from Southern Ethiopia. *BMC Genetics*, 16(1), 98.  
587 doi:10.1186/s12863-015-0250-8
- 588 Oli, M., Biratu, K. S., Hunduma, T., & Selvaraj, T. (2014). Assessment of Disease Intensity and  
589 Evaluation of Enset Clones Against Bacterial Wilt (*Xanthomonas campestris* pv.  
590 *musacearum*) in Tikur Inchini and Jibat Districts of West Shewa , Ethiopia. *International*  
591 *Journal of Research in Science*, 1(2), 83–97. doi: [http://www.i-](http://www.i-scholar.in/index.php/sijrs/article/view/67547/58173)  
592 [scholar.in/index.php/sijrs/article/view/67547/58173](http://www.i-scholar.in/index.php/sijrs/article/view/67547/58173)
- 593 Pajerowska-Mukhtar, K., & Dong, X. (2009). A kiss of death - Proteasome-mediated membrane  
594 fusion and programmed cell death in plant defense against bacterial infection. *Genes and*  
595 *Development*, 23(21), 2449–2454. doi:10.1101/gad.1861609
- 596 Robinson, D and Hayes, A. (2019). *broom*: Convert Statistical Analysis Objects into Tidy Tibbles.  
597 R package version 0.5.2. doi: <https://CRAN.R-project.org/package=broom>
- 598 Schandry, N. (2017). A Practical Guide to Visualization and Statistical Analysis of R.  
599 *solanacearum* Infection Data Using R. *Frontiers in Plant Science*, 8, 1–14.  
600 doi:10.3389/fpls.2017.00623
- 601 Shimwela, M. M., Ploetz, R. C., Beed, F. D., Jones, J. B., Blackburn, J. K., Mkulila, S. I., & van  
602 Bruggen, A. H. C. (2016). Banana xanthomonas wilt continues to spread in Tanzania despite  
603 an intensive symptomatic plant removal campaign: an impending socio-economic and  
604 ecological disaster. *Food Security*, (8), 939–951. doi:10.1007/s12571-016-0609-3
- 605 Schröder, M. S., Culhane, A. C., Quackenbush, J., & Haibe-Kains, B. (2011). *survcomp*: An

- 606 R/Bioconductor package for performance assessment and comparison of survival models.  
607 Bioinformatics. 27(22): 3206-3208. doi:10.1093/bioinformatics/btr511
- 608 Shigeta, M. (1990). Folk in-situ conservation of ensete (*Ensete ventricosum* (welw.) E.E.  
609 Cheesman): Towards the interpretation of indigenous agricultural science of the Ari,  
610 southwestern Ethiopia. *African Study Monographs*, 10(3), 93–107. doi:  
611 [https://repository.kulib.kyoto-u.ac.jp/dspace/bitstream/2433/68056/1/ASM\\_10\\_93.pdf](https://repository.kulib.kyoto-u.ac.jp/dspace/bitstream/2433/68056/1/ASM_10_93.pdf)
- 612 Simko, I., & Piepho, H. (2012). The Area Under the Disease Progress Stairs : Calculation ,  
613 Advantage , and Application. *Phytopathology*, 102(4), 381–389. doi:10.1094/PHYTO-07-11-  
614 0216
- 615 Studholme, D. J., Wicker, E., Abrare, S. M., Aspin, A., Bogdanove, A., Broders, K., et al. (2019).  
616 Transfer of *Xanthomonas campestris* pv. *arecae*, and *Xanthomonas campestris* pv.  
617 *musacearum* to *Xanthomonas vasicola* (Vauterin) as *Xanthomonas vasicola* pv. *arecae* comb.  
618 nov., and *Xanthomonas vasicola* pv. *musacearum* comb. nov. and description of  
619 *Xanthomonas vasicola* pv. *vasculorum* pv. nov. bioRxiv, 571166. doi:  
620 <https://doi.org/10.1101/571166>
- 621 Therneau, T. (2015). *survival*: A Package for Survival Analysis in S. version 2.38, doi:  
622 <https://CRAN.R-project.org/package=survival>
- 623 Therneau, T.M. (2018). *coxme*: Mixed Effects Cox Models. R package version 2.2-10. doi:  
624 <https://CRAN.R-project.org/package=coxme>
- 625 Welde-Michael, G., Bobosha, K., Blomme, G., Addis, T., Mengesha, T., & Mekonnen, S. (2008).  
626 Evaluation of enset clones against enset bacterial wilt. *African Crop Science Journal*, 16(1),  
627 89–95. doi: <http://dx.doi.org/10.4314/acsj.v16i1.54348>
- 628 Wickham, H. (2017). *tidyverse*: Easily Install and Load “Tidyverse” Packages. R package version  
629 1.2.1. doi: <https://CRAN.R-project.org/package=tidyverse>

- 630 Wickham, H. (2019). *modelr*: Modelling Functions that Work with the Pipe. R package version  
631 0.1.4. doi: <https://CRAN.R-project.org/package=modelr>
- 632 Wickham, H. (2019). *stringr*: Simple, Consistent Wrappers for Common String Operations. R  
633 package version 1.4.0. doi: <https://CRAN.R-project.org/package=stringr>
- 634 Wickham, H. and Henry, L. (2019). *tidyr*: Easily Tidy Data with 'spread()' & 'gather()' Functions.  
635 R package version 0.8.3. doi: <https://CRAN.R-project.org/package=tidyr>
- 636 Wickham, H., Chang, W., Henry, L., Pedersen, T. L., Takahashi, K., Wilke, C., & Woo, C. (2018).  
637 *ggplot2*: Create Elegant Data Visualisations Using the Grammar of Graphics. R package  
638 version 3.1.0. doi:10.1093/bioinformatics/btr406
- 639 Wickham, H., François, R., Henry, L., & Müller, K. (2019). *dplyr*: A Grammar of Data  
640 Manipulation. R package version 0.8.1. doi: <https://CRAN.R-project.org/package=dplyr>
- 641 Yemataw, Z., Muzemil, S., Ambachew, D., Tripathi, L., Tesfaye, K., Chala, A., et al. (2018).  
642 Genome sequence data from 17 accessions of *Ensete ventricosum*, a staple food crop for  
643 millions in Ethiopia. *Data in Brief*, 18, 285–293. doi:10.1016/J.DIB.2018.03.026
- 644 Yemataw, Z., Mekonen, A., Chala, A., Tesfaye, K., Mekonen, K., Studholme, D. J., & Sharma,  
645 K. (2017). Farmers' knowledge and perception of enset *Xanthomonas* wilt in southern  
646 Ethiopia. *Agriculture and Food Security*, 6(1). doi:10.1186/s40066-017-0146-0
- 647 Yemataw, Z., Tesfaye, K., Zeberga, A., & Blomme, G. (2016). Exploiting indigenous knowledge  
648 of subsistence farmers' for the management and conservation of Enset (*Ensete ventricosum*  
649 (Welw.) Cheesman) (musaceae family) diversity on-farm. *Journal of Ethnobiology and*  
650 *Ethnomedicine*, 12(1), 34. doi:10.1186/s13002-016-0109-8
- 651 Yemataw, Z., Mohamed, H., Diro, M., Addis, T., & Blomme, G. (2014). Ethnic-based diversity  
652 and distribution of enset (*Ensete ventricosum*) clones in southern Ethiopia. *Journal of Ecology*  
653 *and the Natural Environment*, 6(7), 244–251. <https://cgspace.cgiar.org/handle/10568/66049>.

Muzemil et al. Submitted to European Journal of Plant Pathology

654 Accessed 12 August 2018

655 Yirgou, D., & Bradbury, J. (1974). A note on wilt of banana caused by Enset wilt organism,

656 *Xanthomonas musacearum*. *East African Agricultural and Forestry Journal*. 40:1, 111-114.

657 doi: 10.1080/00128325.1974.11662720

658 Yirgou, D., & Bradbury, J. F. (1968). Bacterial wilt of Enset (*Ensete ventricosum*) incited by

659 *Xanthomonas musacearum* sp.n. *Phytopathology*, 58(1), 111–112. doi:

660 <http://www.musalit.org/seeMore.php?id=10016>

661 Xie, Y. (2019). *knitr*: A General-Purpose Package for Dynamic Report Generation in R. R package

662 version 1.23.

663

664
